# Supplementary material
Source: PubMed Central journal article supplement (PMC5657607)

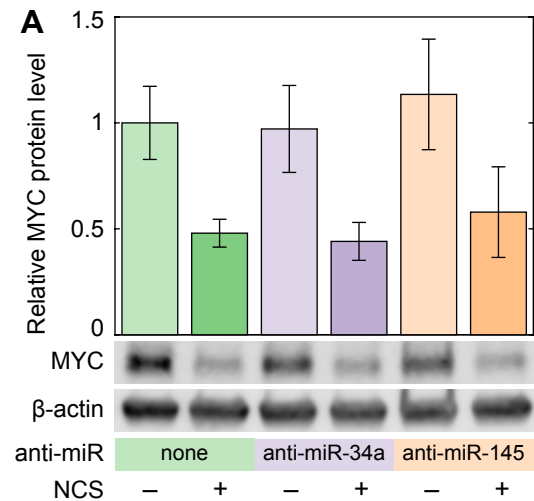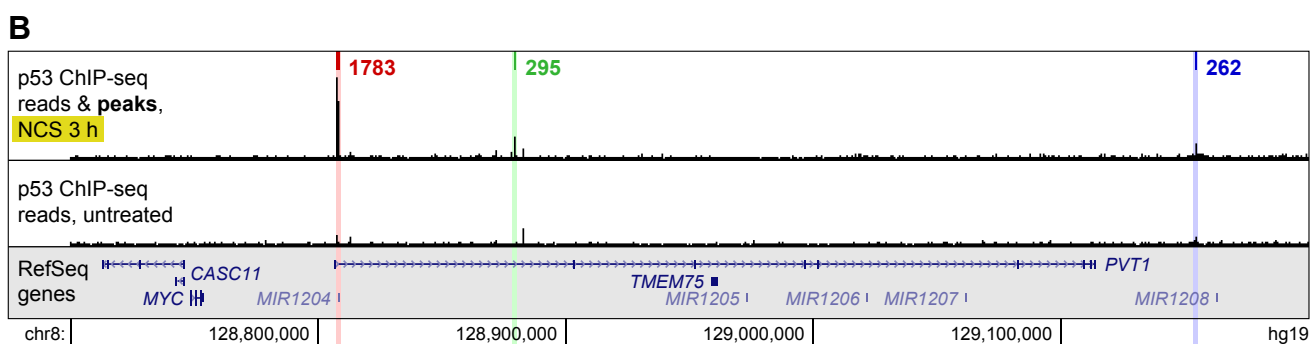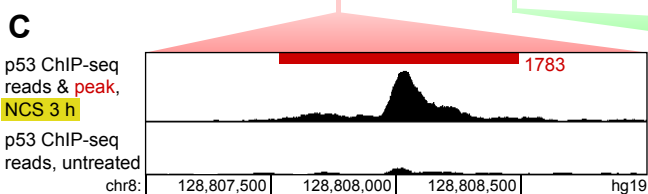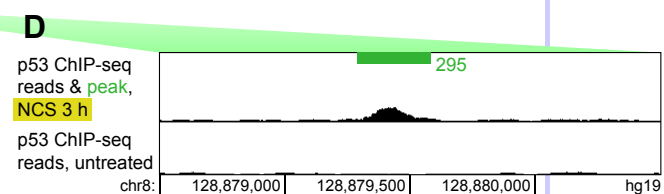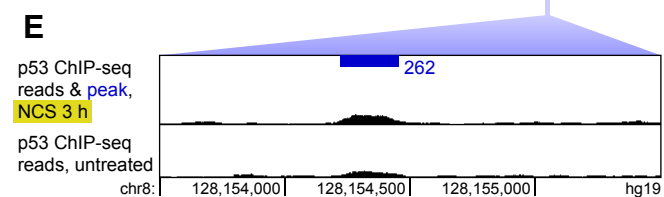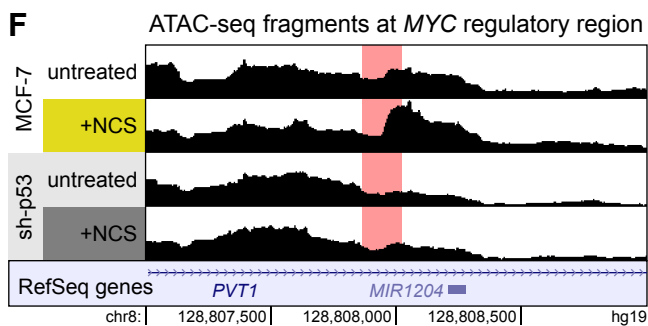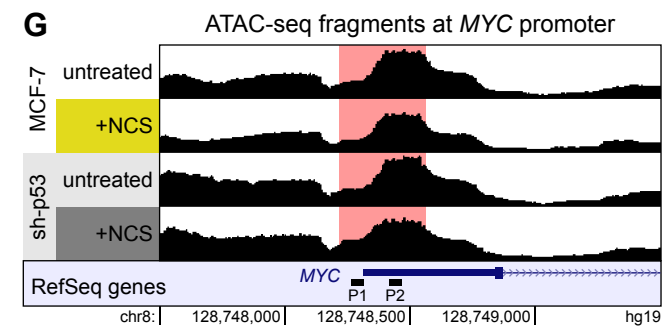

Supplement: NIHMS897350-supplement-1.pdf [file NIHMS897350-supplement-1.pdf]
