# Supplementary material
Source: PubMed Central journal article supplement (PMC5657607)

**A** Enrichment plot: BIOCARTA\_DEATH\_PATHWAY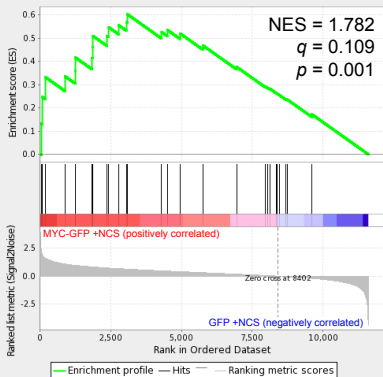**B** Enrichment plot: PID\_CASPASE\_PATHWAY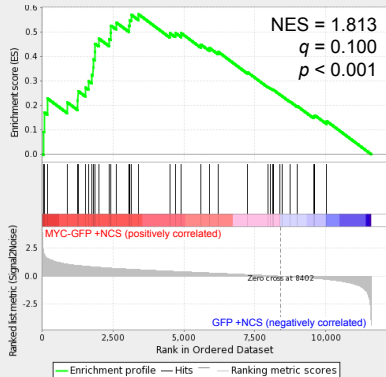**C** Enrichment plot: GNF2\_CCNA2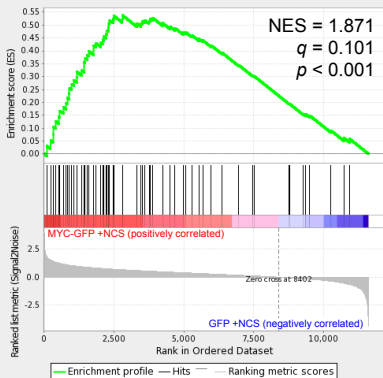**D** Enrichment plot: MORF\_BUB1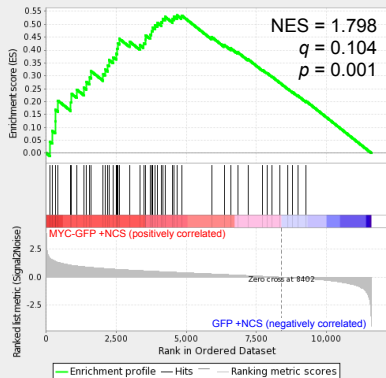

Supplement: NIHMS897350-supplement-3.pdf [file NIHMS897350-supplement-3.pdf]
