# Supplementary material
Source: PubMed Central journal article supplement (PMC5657607)

### All transcripts other than p53 targets

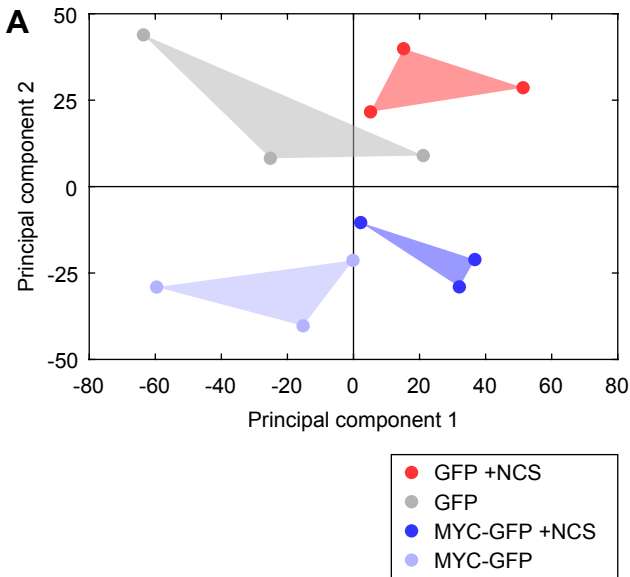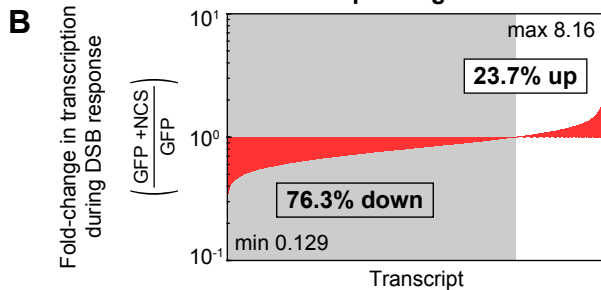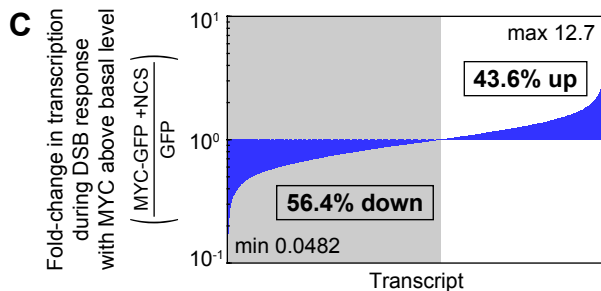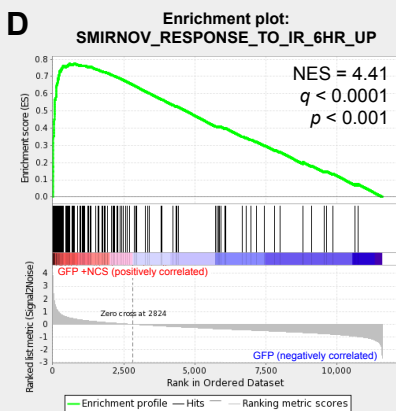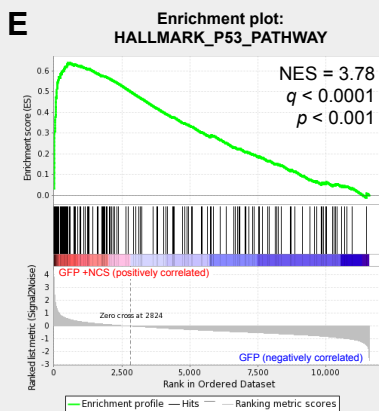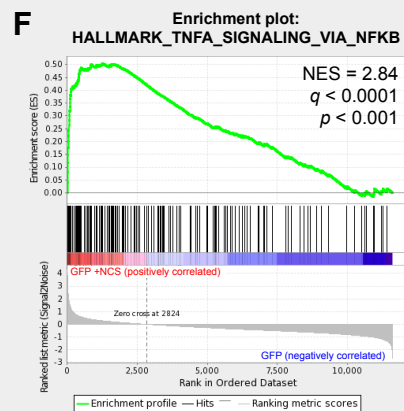

Supplement: NIHMS897350-supplement-2.pdf [file NIHMS897350-supplement-2.pdf]
